# Supplementary material
Source: PubMed Central journal article supplement (PMC2957267)
Supplement: 00529.2009_1.pdf [file 00529.2009_1.pdf]

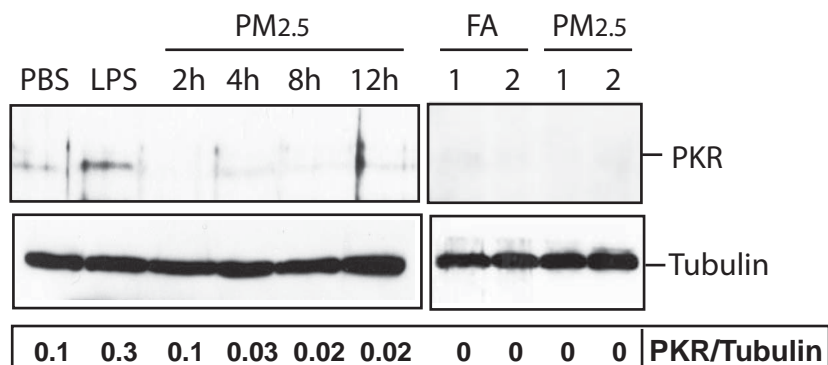

Figure legend:

RAW264.7 cells were treated with LPS (20  $\mu\text{g/ml}$ ) for 6 hours or PM<sub>2.5</sub> (300 $\mu\text{g/ml}$ ) for various time intervals. After the treatments, cell lysates were collected for Western blot analysis with an anti-phosphorylated PKR antibody. The right panel is Western blot analysis for PKR phosphorylation with the liver tissues from mice exposed to PM<sub>2.5</sub> or FA for 10 weeks. Levels of  $\alpha$ -tubulin proteins were determined as internal controls. The values below the gels represent the normalized protein signal intensities.

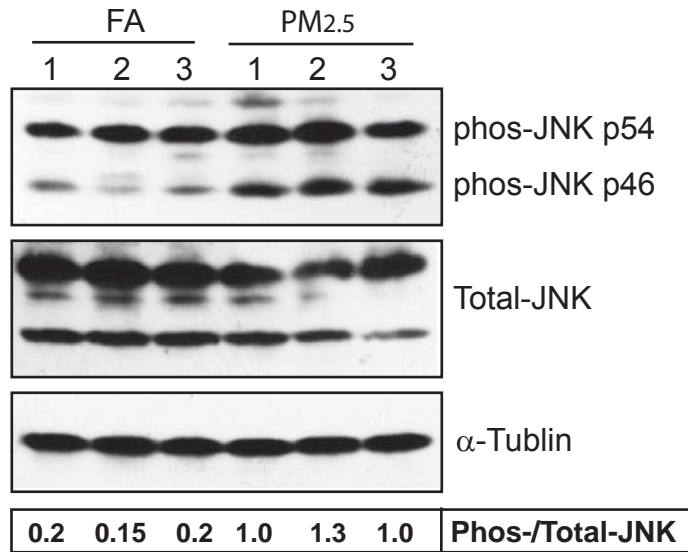

Figure legend:

Western blot analysis for expression levels of phosphorylated and total JNK proteins in the liver tissues of the mice exposed to FA or PM<sub>2.5</sub> for 10 weeks. Denatured liver protein lysates (80  $\mu$ g per sample) are separated on a 10% Tris-glycine polyacrylamide gel. Levels of  $\alpha$ -tubulin proteins were determined as internal controls. The values below the gels represent the ratios of phosphorylated to total JNK signals.

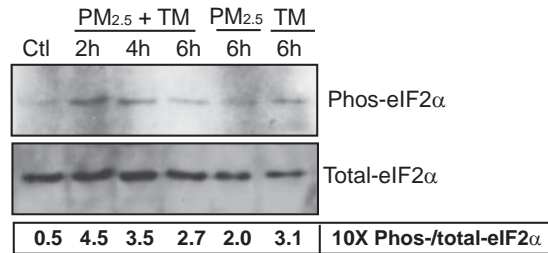

Figure legend:

Detection of phosphorylated and total eIF2 $\alpha$  proteins in RAW264.7 cells exposed to PM<sub>2.5</sub> and/or TM by Western blot analysis. RAW264.7 cells were exposed to PM<sub>2.5</sub> (300  $\mu$ g/ml) for 30 minutes, and then treated with TM (2  $\mu$ g/ml) for the time course as indicated. RAW264.7 cells treated with vehicle PBS buffer or with TM for 6 hours were included as controls. Levels of  $\alpha$ -tubulin protein were determined as internal controls. The values below the gels represent the ratios of phosphorylated to total eIF2 $\alpha$  protein signal intensities
